RESEARCH ARTICLE

# Online Discussion on #KidneyStones: A Longitudinal Assessment of Activity, Users and Content

Johannes Salem<sup>1</sup>\*, Hendrik Borgmann<sup>2</sup>, Matthew Bultitude<sup>3</sup>, Hans-Martin Fritsche<sup>4</sup>, Axel Haferkamp<sup>2</sup>, Axel Heidenreich<sup>1</sup>, Arkadiusz Miernik<sup>5</sup>, Andreas Neisius<sup>2</sup>, Thomas Knoll<sup>6</sup>, Christian Thomas<sup>2</sup>, Igor Tsauro<sup>2</sup>

**1** Department of Urology, University Hospital, Cologne, Germany, **2** Department of Urology, University of Medicine, Mainz, Germany, **3** Stone Unit, Guy's and St. Thomas' NHS Foundation Trust, London, United Kingdom, **4** Department of Urology, Caritas St Josef Hospital, University of Regensburg, Regensburg, Germany, **5** Department of Urology, University Medical Center, Freiburg, Germany, **6** Department of Urology, Klinikum Sindelfingen-Böblingen, Sindelfingen, Germany

\* These authors contributed equally to this work.

\* [j.salem@gesru.de](mailto:j.salem@gesru.de)

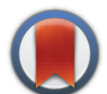

CrossMark  
click for updates

OPEN ACCESS

**Citation:** Salem J, Borgmann H, Bultitude M, Fritsche H-M, Haferkamp A, Heidenreich A, et al. (2016) Online Discussion on #KidneyStones: A Longitudinal Assessment of Activity, Users and Content. PLoS ONE 11(8): e0160863. doi:10.1371/journal.pone.0160863

**Editor:** Jeff M Sands, Emory University Department of Medicine, UNITED STATES

**Received:** April 10, 2016

**Accepted:** July 26, 2016

**Published:** August 18, 2016

**Copyright:** © 2016 Salem et al. This is an open access article distributed under the terms of the [Creative Commons Attribution License](https://creativecommons.org/licenses/by/4.0/), which permits unrestricted use, distribution, and reproduction in any medium, provided the original author and source are credited.

**Data Availability Statement:** The information underlying this study is available from the Symplur Signals database, and can be accessed under [www.simplur.com/signals](http://www.simplur.com/signals) with a fee-based account subscribed for the hashtag #KidneyStones. The time period was set from 1st October 2014 to 1st October 2015. We paid US\$1,099 for a one month explorative analysis.

**Funding:** The authors have no support or funding to report.

## Abstract

### Introduction

Twitter is a popular microblogging platform for the rapid dissemination of information and reciprocal exchange in the urological field. We aimed to assess the activity, users and content of the online discussion, #KidneyStones, on Twitter.

### Methods

We investigated the Symplur Signals analytics tool for Twitter data distributed via the #KidneyStones hashtag over a one year period. Activity analysis reflected overall activity and tweet enhancements. We assessed users' geolocations and performed an influencer analysis. Content analysis included the most frequently used words, tweet sentiment and shares for top tweets.

### Results

3,426 users generated over 10,333 tweets, which were frequently accompanied by links (49%), mentions (30%) and photos (13%). Users came from 106 countries across the globe and were most frequently from North America (63%) and Europe (16%). Individual and organisational healthcare professionals made up 56% of the influencers of the Twitter discussion on #KidneyStones. Besides the words 'kidney' (used 4,045 times) and 'stones' (3,335), 'pain' (1,233), 'urine' (1,158), and 'risk' (1,023) were the most frequently used words. 56% of tweets had a positive sentiment. The median (range) number of shares was 85 (62–587) for the top 10 links, 45.5 (17–94) for the top 10 photos, and 44 (22–95) for the top 10 retweets.

**Competing Interests:** The authors have declared that no competing interests exist.

## Conclusion

The rapidly growing Twitter discussion on #KidneyStones engaged multiple stakeholders in the healthcare sector on a global scale and reached both professionals and laypeople. When used effectively and responsibly, the Twitter platform could improve prevention and medical care of kidney stone patients.

## Introduction

The microblogging social media platform, Twitter, enjoys increasing popularity in the healthcare sector. Currently, over 70% of urologists in Australia and New Zealand have a social media presence, with Twitter being the second most commonly used form after LinkedIn, which serves a completely different purpose [1]. Urologists using Twitter during the European Association of Urology (EAU) and the American Urological Association (AUA) congresses regarded it as beneficial for professional networking, disseminating information, research, advocacy, and career development [2]. Impressively, 1,860 users generated 15,419 tweets in total at the EAU14 and AUA14 congresses [3]. Notably, the Twitter-based International Urology Journal Club, #urojc, has established a high-level academic discussion of urologic manuscripts [4]. In attempt to standardise the online discussion about urological care, a particular structuring of the key urology-related hashtags has recently been proposed [5]. Interestingly, the high technology field of endourology was the first urologic subspecialty assessed for Twitter activity during the 2013 World Congress of Endourology [6]. Most recently, a Twitter discussion during the Third Meeting of the European Association of Urology Section of Urolithiasis 2015 comprised 94 users contributing 446 tweets [7].

In slightly more than a decade, the prevalence of urolithiasis in the United States has increased from 5.2% to 8.8% [8], having a substantial socioeconomic impact [9] and incrementally affecting younger patients [10]. Since evidence has been provided for both highly prevalent urologic conditions and also diseases with young patient age at onset evoking more Twitter activity than their counterparts [11], a vibrant Twitter discussion on stone disease is likely. Interestingly, in conditions with broad-based Twitter communities, such as breast cancer, patients have reported an increase in disease knowledge from participating in Twitter discussions [12].

In the current investigation, we aimed to assess the potential of Twitter to constitute a potential platform for the dissemination of contemporary evidence on prevention, diagnosis and treatment of stone disease. Hypothesising that a Twitter discussion on #KidneyStones might appreciably involve both healthcare givers and laypeople, as well as encourage considerable global public awareness, we investigated the characteristics of its activity, users and content.

## Materials and Methods

The study was approved by the Ethics Commission of the Faculty of Medicine of the University of Cologne. We performed an extensive analysis of activity, users and content of the online discussion on #KidneyStones on Twitter, using the Symplur Signals database. Symplur ([www.symplur.com](http://www.symplur.com)) is a Twitter analysis website that maintains a database of healthcare-related Twitter conversations. Symplur Signals ([www.symplur.com/signals](http://www.symplur.com/signals)) is a fee-based research analytics tool that promotes the understanding of healthcare as seen by patients, doctors and other stakeholders with access to healthcare social media data points.

In October 2015, we searched the Symplur Signals database for analytic insights into the online discussion on #KidneyStones for the time period 1st October 2014 to 1st October 2015. The activity analysis comprised the assessment of overall tweet activity, tweet metrics, engagement metrics and tweet language metrics. Overall tweet activity was recorded as the number of tweets and users, and these were related to time periods. We performed a detailed analysis of the tweet transcript (exact list of all tweets) to assess the issues inducing peak activities. The tweet metrics analysis was performed by retrieving statistics about ratio and frequency of retweets, tweets with links, tweets with photos, tweet replies and tweets where one or more Twitter users were mentioned. Engagement metrics were retrieved by obtaining the number of users who tweeted over a set period of time, grouped by the number of tweets sent. A tweet language analysis illustrated the language used by active participants over a set period of time. Language type was identified by a natural language processing algorithm directly provided by the Twitter application programming interface.

User analysis included the cumulative user report, users' geolocations, and an influencer analysis of the top influencers in the #KidneyStones discussion. Cumulative and new users were recorded for monthly intervals. Cumulative users did not represent recurring users, but were counted as a new user the first time they used the #KidneyStones hashtag and as a previous user in subsequent reporting periods, regardless of activity. The geolocation of users was recorded when users sent tweets tagged with certain geolocation data. We analysed the top 100 contributors to the #KidneyStones discussion, as measured by number of tweets in the influencer analysis. For this purpose, we performed a Twitter profile analysis and assigned these top influencers to these healthcare categories, in line with the Symplur Signals healthcare category definitions: physician; patient; healthcare professional; caregiver/advocate; researcher/academic; individual other healthcare; individual other non-healthcare; organisation provider; organisation research/academic; organisation government; organisation advocate/support; organisation pharma; organisation other healthcare; organisation other non-healthcare, and spam [13].

We used the Symplur Signals tools for content analysis. The 100 most frequently used words in tweets on #KidneyStones were analysed and counted. Since multiple hashtags are often used within a single tweet, we used the hashtag network graph to analyse hashtags accompanying the #KidneyStones discussion and their relationships. The sentiment report analysed tweets for positive and negative sentiment by a natural language processing algorithm. The algorithm is based on two custom dictionaries, one for positive words and one for negative words. Each word in the dictionaries has a weighting from one to five, with five being the highest. Finally, we investigated the most frequently shared links, photos and the most frequently retweeted tweets. We performed statistical calculations using the Statistical Package for the Social Sciences 22.0 software (SPSS Inc., Chicago, IL, USA). Values are described as median and range.

## Results

[Table 1](#) shows overall activity for the #KidneyStones online discussion on Twitter for the time period of one year. 3,426 users produced 10,806 tweets. [Fig 1](#) portrays the weekly number of tweets on #KidneyStones, which slightly increased over the investigated time period. The peak tweet activity occurred during a strategic massive tweet activity of key influencers, evoking a large amount of retweets (influencers: @virtualclinicng, 9th March 2015 and 11th March 2015, 41 tweets on kidney stones prevention leading to a peak of over 500 tweets in a week; @mayo-clinic, 11th July 2015, 41 tweets on kidney stones prevention during a radio show leading to a peak of over 400 tweets in a week).

**Table 1. Overview of tweet activity for the #KidneyStones online discussion on Twitter over a time period of one year.**

| Metric            | Total  | Per Month | Per Week | Per Day | Per Hour |
|-------------------|--------|-----------|----------|---------|----------|
| Tweets            | 10,333 | 849       | 198      | 28.3    | 1.18     |
| Tweets per user   | 3.02   | 0.248     | 0.0578   | 0.00826 | 0.000344 |
| Users who tweeted | 3,426  | 282       | 65.7     | 9.39    | 0.391    |

doi:10.1371/journal.pone.0160863.t001

Out of 10,333 total tweets, 5,013 (49%) were accompanied by links, 3,101 (30%) by mentions and 1,337 (13%) by photos. 2,441 (24%) were retweets and 229 (2%) were tweet replies. 2,798 users (82%) generated one tweet, 331 (10%) two, 244 (7%) three to nine, and 53 (2%) 10 or more tweets. 9,942 (96%) of tweets were in the English language.

Fig 2 demonstrates that the monthly number of users contributing to the #KidneyStones online discussion on Twitter from October 2014 grew steadily, with a median of 262 (range 189–454) new users per month. The median number of active users contributing to the #KidneyStones online discussion was 304.5 per month (range 227–545). Users came from 106 countries and from all continents around the globe (Fig 3). The S1 Table lists the location of users according to country and continent. North American users were most active (63%), ahead of

## #KidneyStones Tweet Activity

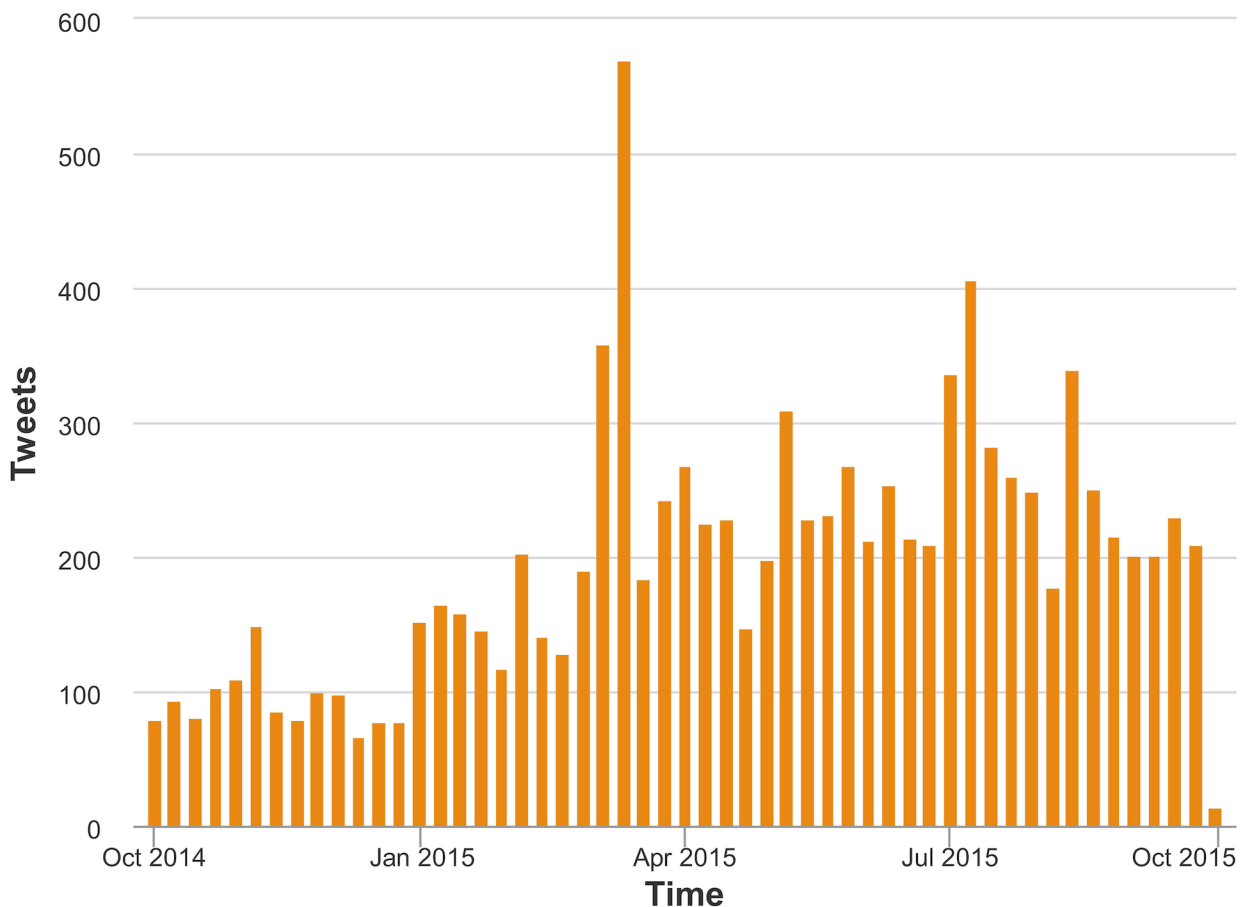

**Fig 1. Tweet activity for the #KidneyStones online discussion on Twitter during the one year period.** The weekly numbers of tweets are represented as columns.

doi:10.1371/journal.pone.0160863.g001

# #KidneyStones Cumulative Users

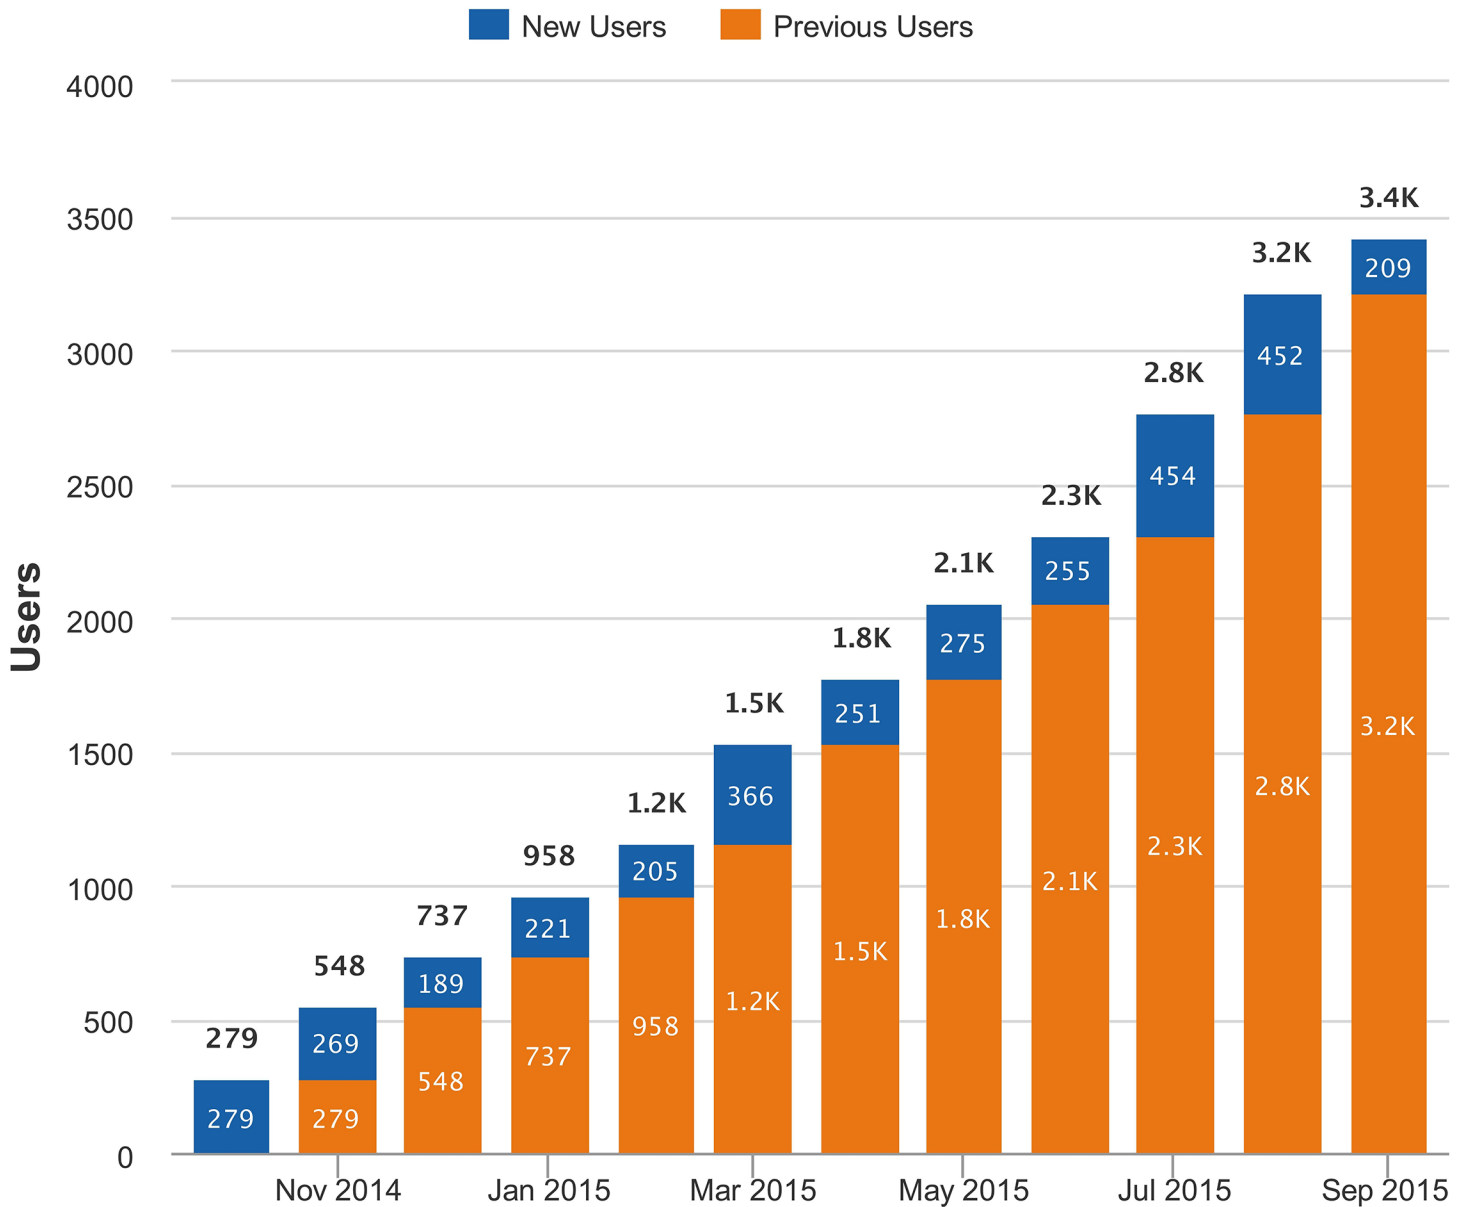

**Fig 2. Growth in number of users contributing to the #KidneyStones online discussion on Twitter.**

doi:10.1371/journal.pone.0160863.g002

European users (16%) and Asian users (10%). The top 100 influencers in the #KidneyStones online discussion on Twitter, according to the number of tweets posted in the study period, and stratified by healthcare category, are shown in Fig 4. Individuals not involved in healthcare (38%) and healthcare organisations (37%; organisations: provider, advocate/support, government, other) were the main influencers in the discussion. There were no spam accounts among the top 100 influencers.

A content analysis of the most frequently used words in the #KidneyStones online discussion on Twitter is shown in Fig 5. Besides 'kidney' (used 4,045 times) and 'stones' (3,335),

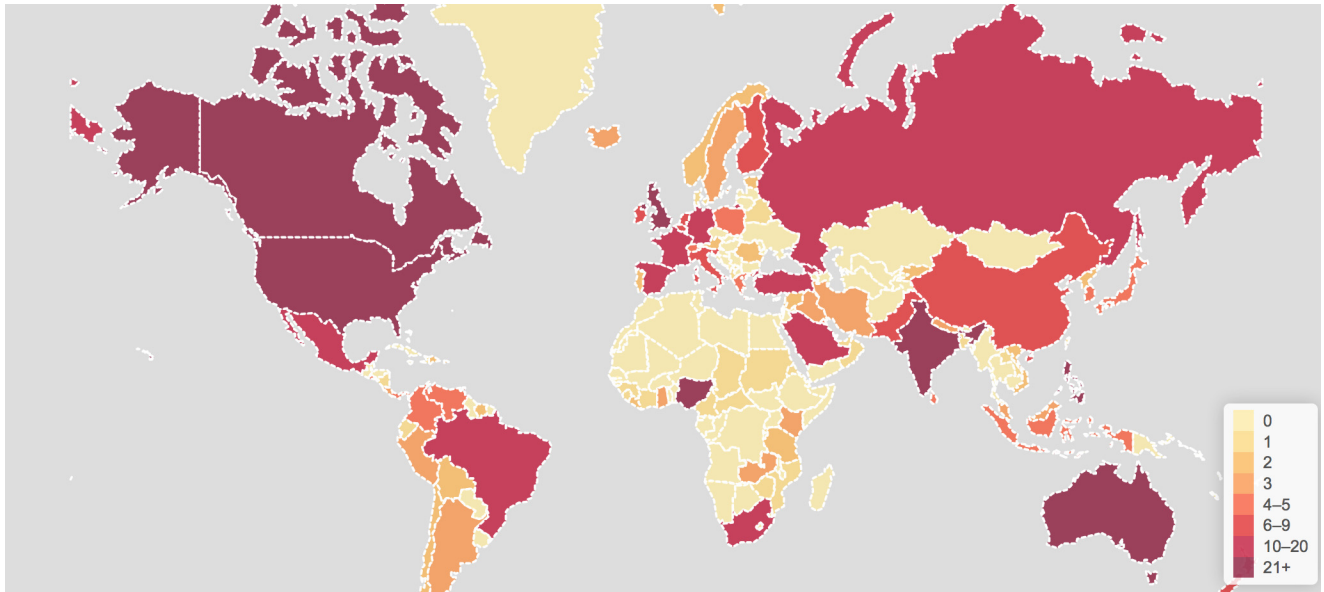

**Fig 3. Geolocation of users contributing to the #KidneyStones online discussion on Twitter.** The colour tone reflects the number of users per country: the colour shifts from light tones (countries with few or no users) to dark tones (countries with many users).

doi:10.1371/journal.pone.0160863.g003

'pain' (1,233), 'urine' (1,158), and 'risk' (1,023) were the top words. The [S2 Table](#) presents the complete content analysis with the 100 most frequently used words in #KidneyStones tweets. The largest thematic proportion of tweets focused on disease awareness and prevention (35 of 100 words). The sentiment analysis revealed that 56% of the tweets had a positive sentiment and 44% had a negative sentiment. The median (range) number of shares for the top 10 links was 85 (62–587) and 45.5 (17–94) for the top 10 photos. The top 10 retweets had a median of 44 (22–95) retweets. The #KidneyStones hashtag was often related to the #health, #renalcolic, #renalcalculus and #kidney hashtags.

## Discussion

We performed a longitudinal assessment of activity, users and content of the online discussion on #KidneyStones, using the Sympplr Signals health analytics database. Over the one year period, Twitter activity was reflected by 10,806 tweets, which were frequently enhanced with links and mentions, and were posted predominantly in English. Together, 3,426 users from 106 countries contributed to the online discussion, with non-professional individuals and health-care organisations being the main influencers. Content was dominated by the words 'kidney', 'stones', 'pain', 'urine' and 'risk', and tweets had more positive than negative sentiments. The top links, photos and retweets were shared up to 100 times.

The Twitter activity of 10,806 tweets found for #KidneyStones in the study period is much higher than 880 tweets found in 2012 for urinary tract infection, another urological disease [14]. The majority of Twitter activity data in the literature are published on urological oncology diseases, such as #testicularcancer (10,376 tweets in 2014) or #prostatecancer (79,242 tweets in 2014) [15]. Comparisons of tweet activity between #KidneyStones as a benign disease and malignant diseases are compromised since the potentially life-threatening character of oncological topics has been shown to provoke an over-representation on Twitter [14].

The tweet metric analysis showed that contributors interacted using retweets (24%) and mentions (30%) in their tweets. Relevant tweets inducing retweets are of high interest to the

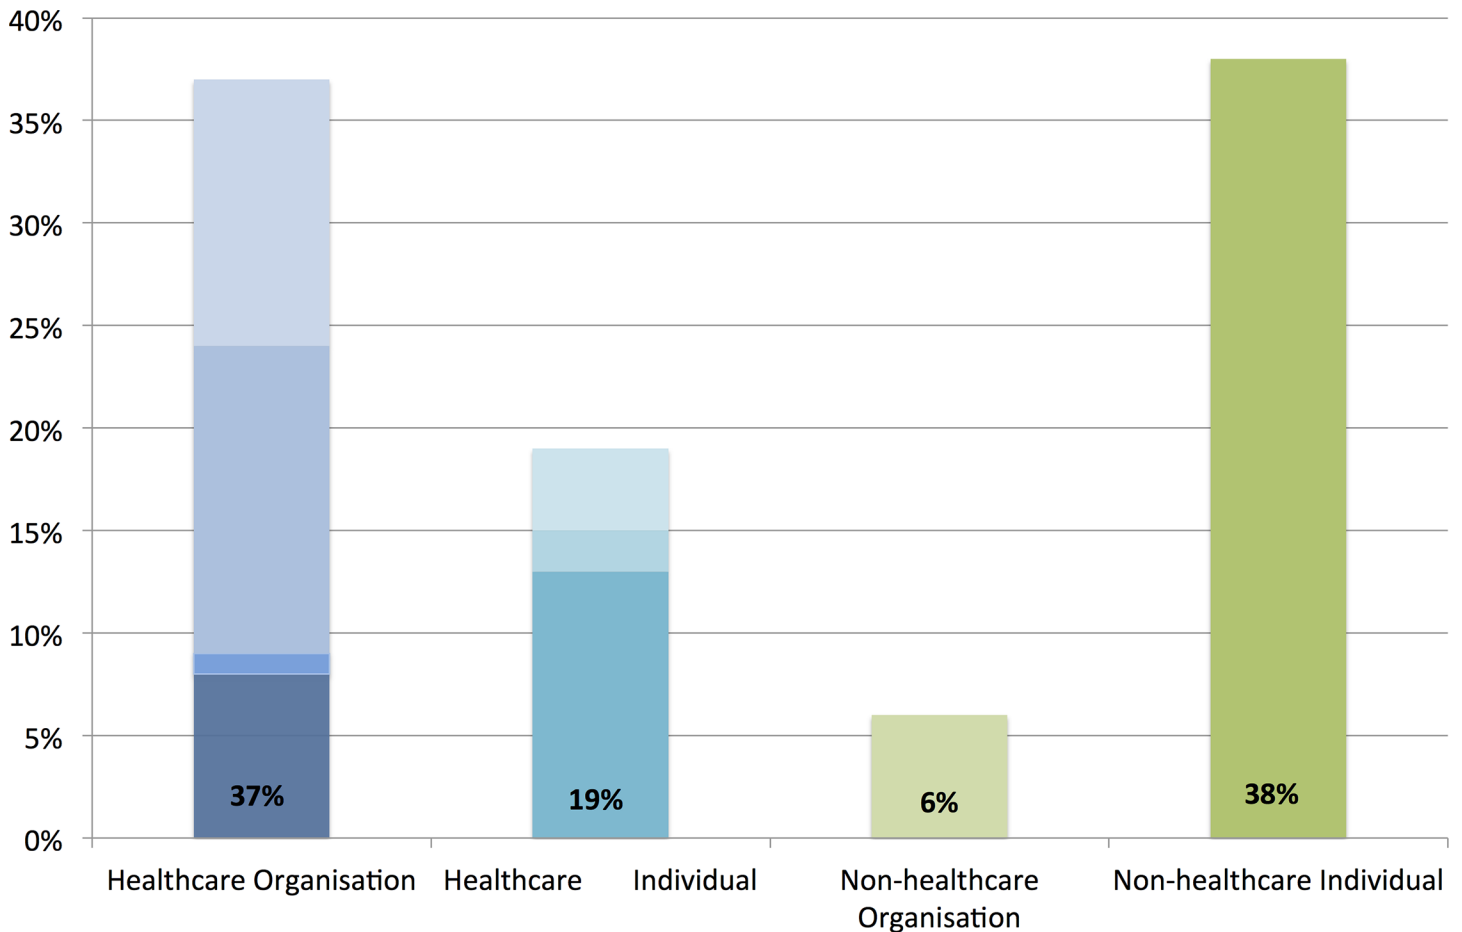

**Fig 4. Top 100 influencers in the #KidneyStones online discussion on Twitter according to tweet volume stratified by healthcare category.** Healthcare organisation consists of 8% provider, 1% government, 15% advocate/support and 13% other healthcare organisations (from darker blue to lighter blue). Healthcare individual consists of 13% doctors, 2% healthcare practitioners and 4% other healthcare individuals (from darker turquoise to lighter turquoise).

doi:10.1371/journal.pone.0160863.g004

Twitter community, which is underlined by the recently introduced concept of the Twitter impact factor [16]. Moreover, almost half of the tweets were enhanced by a link. This is encouraging since the combination ‘statement + proof’ is a basic principle in science which can be translated to Twitter as the combination ‘statement + link’. A tweet analysis on the topic of dementia showed that the top users applied links more frequently than average users [17]. Similarly, successful tweets from public state health departments contained links in the majority of tweets [18]. Thus, a high number of links used in tweets for #KidneyStones appears to enhance the reach of tweets and enables followers to check the trustworthiness of the short information presented in one tweet. Additionally, links enable more information to be conveyed in the tweet than the 140 characters would otherwise allow.

The Twitter discussion on #KidneyStones is global, involving users from all continents. Usage rates of social media were 74% among American urologists in 2013 [19] and 70% among Australian urologists in 2014 [1]. As social media adoption rates continue to grow, so did the number of cumulative contributors to the #KidneyStones discussion. This is in line with our previous study on urologic oncology, with steadily increasing tweet activity over time [15]. Twitter allows for rapid, informal, and thus low-threshold, participation in an online discussion. These characteristics make it appealing for laypeople to join in the conversation. Notably,





[9]. Importantly, urolithiasis is associated with a 30–50% risk of recurrence within seven years of initial treatment [21, 22]. Secondary nonmedical prevention with fluid intake, specific dietary therapy, adoption of a ‘healthy’ lifestyle [23–25] as well as preventive pharmacological treatment [26–28] were reported to effectively reduce recurrence rates. Unfortunately, due to patient and provider scepticism about the evidence of secondary prevention effectiveness, it is infrequently utilised in daily routines [29, 30]. An additional hurdle to the implementation of preventive measures is low patient compliance; roughly half of stone formers were reported to adhere to a prescribed preventive therapy in a contemporary series [30]. Considering the under-utilised potential of primary and secondary prevention of urolithiasis, the Twitter platform might make a beneficial contribution in these areas. The #KidneyStones Twitter discussion can deliver currently valid guidelines and recommendations on urolithiasis prevention to laypeople and thus lead to both a decrease of recurrence rates and increased cost-savings. In this context, using links and photos to enhance a tweet’s content and its reach can therefore be a successful strategy. The most shared link in our analysis was distributed 587 times and the most shared photos and retweets were spread up to nearly 100 times.

Although the #KidneyStones hashtag is proposed as standardised communication descriptor [5], we acknowledge that this single hashtag cannot capture all the information that is exchanged on urolithiasis on the Twitter platform. Particularly during congresses with high tweet activity using multiple hashtags, discussions on stone disease might take place beside the #KidneyStones channel.

We also used the Symplur Signals analytics platform for a systematic assessment of healthcare social media data. The automated data extraction and analysis algorithms allow for the analysis of a vast amount of data, but cannot detect linguistic nuances, such as ambiguity or irony when analysing content. Lastly, Twitter is a rapidly growing and changing social media platform, implying that the results of our contemporary analysis might be out-dated in the near future.

Notwithstanding the aforementioned limitations, several practice-oriented conclusions can be drawn from the findings of the current study. The Twitter discussion on #KidneyStones is maintained by users from all over the world and evokes a remarkable number of tweets, underscoring the global reach of this microblogging platform. Healthcare organisations, as one of the top influencers in the discussion, have a unique opportunity to raise the awareness of patients and providers for nonmedical and pharmacological prevention, eventually reducing recurrence rates and care-related expenditure. Patients and other laypeople substantially contributing to the discussion have the option of being discreetly and noncommittally counselled by experts, optimising shared decision-making. Finally, given responsible Twitter usage, the dissemination of novel diagnostic and therapeutic developments in the area of urolithiasis between stakeholders and patients might be considerably accelerated.

## Conclusion

The Twitter discussion on #KidneyStones engaged multiple stakeholders in the healthcare sector on a global scale and involves both professionals and laypeople. Considering the rapidly increasing prevalence and treatment-related costs of urolithiasis, Twitter might promote shared decision-making and contribute to the optimisation of patient care.

## Supporting Information

**S1 Table. Geolocation of users of the #KidneyStones online discussion on Twitter.**  
(XLSX)

**S2 Table. Top 100 words used in the #KidneyStones online discussion on Twitter.**  
(XLSX)

## Acknowledgments

The authors wish to thank all the participants in the lively Twitter discussion on #KidneyStones.

## Author Contributions

**Conceived and designed the experiments:** JS HB IT.

**Performed the experiments:** JS HB IT.

**Analyzed the data:** JS HB MB HMF A. Haferkamp A. Heidenreich AM AN TK CT IT.

**Contributed reagents/materials/analysis tools:** JS HB IT.

**Wrote the paper:** JS HB MB HMF A. Haferkamp A. Heidenreich AM AN TK CT IT.

## References

1. Davies N, Murphy DG, van Rij S, Woo HH, Lawrentschuk N. Online and social media presence of Australian and New Zealand urologists. *BJU Int.* 2015; 116(6): 984–989. doi: [10.1111/bju.13159](https://doi.org/10.1111/bju.13159) PMID: [25906813](https://pubmed.ncbi.nlm.nih.gov/25906813/).
2. Borgmann HD, Tsuar IS, Haferkamp A, Loeb S. Novel survey disseminated through Twitter supports its utility for networking, disseminating research, advocacy, clinical practice and other professional goals. *CUAJ.* 2015; 9(9–10). Novel survey disseminated through Twitter supports its utility for networking, disseminating research, advocacy, clinical practice and other professional goals.
3. Chung A, Woo H. Twitter in urology and other surgical specialties at global conferences. *ANZ J Surg.* 2015. doi: [10.1111/ans.13393](https://doi.org/10.1111/ans.13393) PMID: [26631323](https://pubmed.ncbi.nlm.nih.gov/26631323/).
4. Thangasamy IA, Leveridge M, Davies BJ, Finelli A, Stork B, Woo HH. International Urology Journal Club via Twitter: 12-month experience. *Eur Urol.* 2014; 66(1): 112–117. doi: [10.1016/j.eururo.2014.01.034](https://doi.org/10.1016/j.eururo.2014.01.034) PMID: [24548686](https://pubmed.ncbi.nlm.nih.gov/24548686/).
5. Kutikov A, Woo HH, Catto JW. Urology tag ontology project: Standardizing social media communication descriptors. *Eur Urol.* 2015. doi: [10.1016/j.eururo.2015.09.034](https://doi.org/10.1016/j.eururo.2015.09.034) PMID: [26443429](https://pubmed.ncbi.nlm.nih.gov/26443429/).
6. Canvasser NE, Ramo C, Morgan TM, Zheng K, Hollenbeck BK, Ghani KR. The use of social media in endourology: An analysis of the 2013 World Congress of Endourology meeting. *J Endourol.* 2015; 29(5): 615–620. doi: [10.1089/end.2014.0329](https://doi.org/10.1089/end.2014.0329) PMID: [25026076](https://pubmed.ncbi.nlm.nih.gov/25026076/).
7. Symplur. The Healthcare Hashtag Project. Available from: <http://www.simplur.com>.
8. Scales CD Jr, Smith AC, Hanley JM, Saigal CS. Urologic diseases in America. Prevalence of kidney stones in the United States. *Eur Urol.* 2012; 62(1): 160–165. doi: [10.1016/j.eururo.2012.03.052](https://doi.org/10.1016/j.eururo.2012.03.052) PMID: [22498635](https://pubmed.ncbi.nlm.nih.gov/22498635/); PubMed Central PMCID: [PMCPMC3362665](https://pubmed.ncbi.nlm.nih.gov/PMC3362665/).
9. Antonelli JA, Maalouf NM, Pearle MS, Lotan Y. Use of the National Health and Nutrition Examination Survey to calculate the impact of obesity and diabetes on cost and prevalence of urolithiasis in 2030. *Eur Urol.* 2014; 66(4): 724–729. doi: [10.1016/j.eururo.2014.06.036](https://doi.org/10.1016/j.eururo.2014.06.036) PMID: [25015037](https://pubmed.ncbi.nlm.nih.gov/25015037/); PubMed Central PMCID: [PMCPMC4227394](https://pubmed.ncbi.nlm.nih.gov/PMC4227394/).
10. Tasian GE, Ross ME, Song L, Sas DJ, Keren R, Denburg MR, et al. Annual incidence of nephrolithiasis among children and adults in South Carolina from 1997 to 2012. *Clin J Am Soc Nephrol.* 2016. doi: [10.2215/CJN.07610715](https://doi.org/10.2215/CJN.07610715) PMID: [26769765](https://pubmed.ncbi.nlm.nih.gov/26769765/).
11. Leveridge MJ. The state and potential of social media in bladder cancer. *World J Urol.* 2015. doi: [10.1007/s00345-015-1725-y](https://doi.org/10.1007/s00345-015-1725-y) PMID: [26590917](https://pubmed.ncbi.nlm.nih.gov/26590917/).
12. Attai DJ, Cowher MS, Al-Hamadani M, Schoger JM, Staley AC, Landercasper J. Twitter social media is an effective tool for breast cancer patient education and support: Patient-reported outcomes by survey. *J Med Internet Res.* 2015; 17(7): e188. doi: [10.2196/jmir.4721](https://doi.org/10.2196/jmir.4721) PMID: [26228234](https://pubmed.ncbi.nlm.nih.gov/26228234/).
13. Signals S. Healthcare category definitions. Available from: [https://docs.google.com/spreadsheets/d/1Hexl7X1KR0dPdFvJkd34DEtHF\\_18BGHzdnPNrauHNw/edit—gid=0&vpid=A1](https://docs.google.com/spreadsheets/d/1Hexl7X1KR0dPdFvJkd34DEtHF_18BGHzdnPNrauHNw/edit—gid=0&vpid=A1).

14. Weeg C, Schwartz HA, Hill S, Merchant RM, Arango C, Ungar L. Using Twitter to measure public discussion of diseases: A case study. *JMIR Public Health Surveill.* 2015; 1(1): e6. doi: [10.2196/publichealth.3953](https://doi.org/10.2196/publichealth.3953) PMID: [26925459](https://pubmed.ncbi.nlm.nih.gov/26925459/); PubMed Central PMCID: PMC4763717.
15. Borgmann H, Loeb S, Salem J, Thomas C, Haferkamp A, Murphy DG, et al. Activity, content, contributors, and influencers of the Twitter discussion on urologic oncology. *Urol Oncol.* 2016. doi: [10.1016/j.urolonc.2016.02.021](https://doi.org/10.1016/j.urolonc.2016.02.021) PMID: [27036217](https://pubmed.ncbi.nlm.nih.gov/27036217/).
16. Cardona-Grau D SI, Leinwand G, Welliver C. Introducing the Twitter impact factor: An objective measure of urology's academic impact on Twitter. *Eur Urol Focus.* 2016; 138: In press.
17. Robillard JM, Johnson TW, Hennessey C, Beattie BL, Illes J. Aging 2.0: Health information about dementia on Twitter. *PLoS One.* 2013; 8(7): e69861. doi: [10.1371/journal.pone.0069861](https://doi.org/10.1371/journal.pone.0069861) PMID: [23922827](https://pubmed.ncbi.nlm.nih.gov/23922827/); PubMed Central PMCID: PMC3724927.
18. Thackeray R, Neiger BL, Burton SH, Thackeray CR. Analysis of the purpose of state health departments' tweets: Information sharing, engagement, and action. *J Med Internet Res.* 2013; 15(11):e255. doi: [10.2196/jmir.3002](https://doi.org/10.2196/jmir.3002) PMID: [24217361](https://pubmed.ncbi.nlm.nih.gov/24217361/); PubMed Central PMCID: PMC3841368.
19. Loeb S, Bayne CE, Frey C, Davies BJ, Averch TD, Woo HH, et al. Use of social media in urology: data from the American Urological Association (AUA). *BJU Int.* 2014; 113(6): 993–998. doi: [10.1111/bju.12586](https://doi.org/10.1111/bju.12586) PMID: [24274744](https://pubmed.ncbi.nlm.nih.gov/24274744/).
20. Lotan Y, Buendia Jimenez I, Lenoir-Wijnkoop I, Daudon M, Molinier L, Tack I, et al. Primary prevention of nephrolithiasis is cost-effective for a national healthcare system. *BJU Int.* 2012; 110(11 Pt C): E1060–7. doi: [10.1111/j.1464-410X.2012.11212.x](https://doi.org/10.1111/j.1464-410X.2012.11212.x) PMID: [22686216](https://pubmed.ncbi.nlm.nih.gov/22686216/).
21. Sun BY, Lee YH, Jiaan BP, Chen KK, Chang LS, Chen KT. Recurrence rate and risk factors for urinary calculi after extracorporeal shock wave lithotripsy. *J Urol.* 1996; 156(3): 903–905; discussion 6. PMID: [8709359](https://pubmed.ncbi.nlm.nih.gov/8709359/).
22. Trinchieri A, Ostini F, Nespoli R, Rovera F, Montanari E, Zanetti G. A prospective study of recurrence rate and risk factors for recurrence after a first renal stone. *J Urol.* 1999; 162(1): 27–30. doi: [10.1097/00005392-199907000-00007](https://doi.org/10.1097/00005392-199907000-00007) PMID: [10379732](https://pubmed.ncbi.nlm.nih.gov/10379732/).
23. Borghi L, Meschi T, Amato F, Briganti A, Novarini A, Giannini A. Urinary volume, water and recurrences in idiopathic calcium nephrolithiasis: a 5-year randomized prospective study. *J Urol.* 1996; 155(3): 839–843. PMID: [8583588](https://pubmed.ncbi.nlm.nih.gov/8583588/).
24. Kocvara R, Plasgura P, Petrik A, Louzensky G, Bartonickova K, Dvoracek J. A prospective study of nonmedical prophylaxis after a first kidney stone. *BJU Int.* 1999; 84(4): 393–398. PMID: [10468751](https://pubmed.ncbi.nlm.nih.gov/10468751/).
25. Siener R, Glatz S, Nicolay C, Hesse A. The role of overweight and obesity in calcium oxalate stone formation. *Obes Res.* 2004; 12(1): 106–113. doi: [10.1038/oby.2004.14](https://doi.org/10.1038/oby.2004.14) PMID: [14742848](https://pubmed.ncbi.nlm.nih.gov/14742848/).
26. Barcelo P, Wuhl O, Servitge E, Rousaud A, Pak CY. Randomized double-blind study of potassium citrate in idiopathic hypocitraturic calcium nephrolithiasis. *J Urol.* 1993; 150(6): 1761–1764. PMID: [8230497](https://pubmed.ncbi.nlm.nih.gov/8230497/).
27. Ettinger B, Tang A, Citron JT, Livermore B, Williams T. Randomized trial of allopurinol in the prevention of calcium oxalate calculi. *N Engl J Med.* 1986; 315(22): 1386–1389. doi: [10.1056/NEJM198611273152204](https://doi.org/10.1056/NEJM198611273152204) PMID: [3534570](https://pubmed.ncbi.nlm.nih.gov/3534570/).
28. Laerum E, Larsen S. Thiazide prophylaxis of urolithiasis. A double-blind study in general practice. *Acta Med Scand.* 1984; 215(4): 383–389. PMID: [6375276](https://pubmed.ncbi.nlm.nih.gov/6375276/).
29. Daww CA, Alruwaily AF, Bierlein MJ, Asplin JR, Ghani KR, Wolf JS Jr., et al. Provider variation in the quality of metabolic stone management. *J Urol.* 2015; 193(3): 885–890. doi: [10.1016/j.juro.2014.09.111](https://doi.org/10.1016/j.juro.2014.09.111) PMID: [25286012](https://pubmed.ncbi.nlm.nih.gov/25286012/).
30. Daww CA, Yi Y, Bierlein MJ, Yan P, Alruwaily AF, Ghani KR, et al. Medication nonadherence and effectiveness of preventive pharmacological therapy for kidney stones. *J Urol.* 2015. doi: [10.1016/j.juro.2015.10.082](https://doi.org/10.1016/j.juro.2015.10.082) PMID: [26485048](https://pubmed.ncbi.nlm.nih.gov/26485048/).
